# Supplementary material
Source: publisher figshare collection journal article supplement (https://frontiersin.figshare.com/ndownloader/files/21021297)
Supplement: Supplementary file 1 [file 21021297]

Supplementary Material

This appendix provides supplemental figures, statistics, and results to our main paper.

Table A1 displays fishing-related and demographic characteristics of sample anglers and survey non-respondents.

Table A2 displays the results of a binomial logit model in which the propensity that individual responds to the survey is specified as

, (1)

where the dependent variable, , is discrete and equals one if an individual responds to the survey and zero otherwise, is a vector of demographic and fishing related variables whose relative impact on response propensity is measured by the parameters in , and is an independently and identically distributed error term. All estimates in Table A2 are statistically significant at the 5% level of confidence or higher, except for that on the indicator variable for primary fishing method, which equals one if an individual fishes for striped bass from a kayak, private boat, charter boat, or party boat, and zero otherwise. is measured using the midpoint of each response category.[[1]](#footnote-1) The coefficient on this variable indicates that for each a $10,000 increase in household income, the odds an individual responds to the survey increases by a factor of 1.039. Age is also positively correlated with response propensity; a one-year increase in individuals’ age increases the odds of responding the survey by a factor of 1.056. Intuitively, response propensity decreases with decreases in individuals’ likelihood of fishing in the next 12 months. The odds that an individual who will “definitely will not go fishing” responds to the survey is lower compared to those who are certain to go fishing by a factor of 12.

Table A3 displays estimation results from a panel rank-ordered mixed logit model in which observations are weighted by the inverse of predicted response propensity. Estimated mean utility parameters from this model are consistent with those estimated by our preferred specification in the main paper.

| Table A1. Demographic and fishing-related characteristics of sample anglers and survey non-respondents. | | |
| --- | --- | --- |
| Characteristic | Sample anglers (N=469) | Non-respondents (N=143) |
| Days saltwater fished past 12 months (mean days) | 26.73 (n=419) | 19.89 (n=139) |
| Days striped bass fished past 12 months (mean days) | 14.75 (n=419) | 8.48 (n=137) |
| Primary striped bass fishing mode (% of sample) |  |  |
| Shore | 36.25 | 44.76 |
| Kayak | 2.99 | 2.10 |
| Private motorized boat | 54.58 | 44.76 |
| Charter boat | 4.26 | 6.99 |
| Head or party boat | 1.92 | 1.40 |
| Did not answer | 0.00 | 0.00 |
| Likelihood of recreational striped bass fishing during the next 12 months (% of sample) |  |  |
| Certain to go fishing | 65.46 | 37.06 |
| Very likely | 23.67 | 37.06 |
| Somewhat likely | 8.74 | 17.48 |
| Very unlikely | 1.92 | 4.90 |
| Definitely will not go fishing | 0.21 | 2.80 |
| Did not answer | 0.00 | 0.70 |
| Age (mean age) | 54.35 (n=460) | 44.27 (n=135) |
| Household income (% of sample) |  |  |
| Less than $20,000 | 2.77 | 3.50 |
| $20,000 to $39,999 | 5.54 | 9.09 |
| $40,000 to $59,999 | 11.30 | 14.69 |
| $60,000 to $79,999 | 9.38 | 8.39 |
| $80,000 to $99,999 | 14.29 | 9.79 |
| $100,000 to $149,999 | 23.88 | 14.69 |
| $150,000 to $199,999 | 17.06 | 6.99 |
| $200,000 or more | 11.51 | 10.49 |
| Did not answer | 4.26 | 22.38 |

| Table A2. Results from response propensity model. | |
| --- | --- |
| Variable | Odds Ratio  (standard error) |
| Primarily fish for striped bass on a boat (1=yes) | 1.086 |
|  | (0.260) |
| Income ($10,000s) | 1.039** |
|  | (0.020) |
| Age | 1.056*** |
|  | (0.009) |
| Likelihood of recreational striped bass fishing during the next 12 months† |  |
| Very likely | 0.378*** |
|  | (0.100) |
| Somewhat likely | 0.247*** |
|  | (0.084) |
| Very unlikely | 0.209** |
|  | (0.134) |
| Definitely will not go fishing | 0.083** |
|  | (0.099) |
| Constant | 0.307** |
|  | (0.150) |
| Number of observations | 557 |
| Pseudo R2 | 0.162 |
| Notes: †baseline is “Certain to go fishing”. *,**, and *** represent significance at the 10%, 5%, and 1% level of significance, respectively | |

| Table A3. Utility parameter estimates from panel rank-ordered mixed logit model weighted with the inverse of predicted response propensities. | | | | |
| --- | --- | --- | --- | --- |
| Variable | Coefficient | | Standard Error | |
| *Random parameters* |  | |  | |
| Small keep | 0.280*** | | 0.055 | |
| Medium keep | 0.344*** | | 0.057 | |
| Trophy keep | 0.637*** | | 0.088 | |
| Small release | 0.082*** | | 0.020 | |
| Medium release | 0.172*** | | 0.056 | |
| Trophy release | 0.249*** | | 0.039 | |
|  |  | |  | |
| *Fixed parameters* |  | |  | |
| Other catch | 0.137*** | | 0.015 | |
| Cost | -0.018*** | | 0.002 | |
| Opt-out | -3.017*** | | 0.204 | |
| Total bag limit | 0.076 | | 0.058 | |
| No small | -0.107 | | 0.093 | |
| No small or medium | -0.543*** | | 0.097 | |
| No trophy | -0.043 | | 0.075 | |
|  |  |  | |  |
| *Standard deviations of random parameters (diagonal values in* ***Γ****)* | | | | |
| Small keep | 0.878*** | | 0.063 | |
| Medium keep | 1.004*** | | 0.054 | |
| Trophy keep | 0.450*** | | 0.081 | |
| Small release | 0.070*** | | 0.022 | |
| Medium release | 0.120** | | 0.058 | |
| Trophy release | 0.219*** | | 0.034 | |
|  |  |  | | |
| *Covariance of random parameters (below diagonal values in* ***Γ****)* | | | | |
| Medium keep:Small keep | 0.531*** | | 0.043 | |
| Trophy keep:Small keep | 0.864*** | | 0.072 | |
| Trophy keep:Medium keep | 0.679*** | | 0.073 | |
| Small release:Small keep | 0.063*** | | 0.020 | |
| Small release:Medium keep | 0.181*** | | 0.022 | |
| Small release:Trophy keep | 0.254*** | | 0.021 | |
| Medium release:Small keep | 0.114** | | 0.058 | |
| Medium release:Medium keep | -0.031 | | 0.057 | |
| Medium release:Trophy keep | 0.037 | | 0.055 | |
| Medium release:Small release | 0.495*** | | 0.056 | |
| Trophy release:Small keep | 0.384*** | | 0.034 | |
| Trophy release:Medium keep | 0.072** | | 0.034 | |
| Trophy release:Trophy keep | 0.168*** | | 0.034 | |
| Trophy release:Small release | 0.259*** | | 0.033 | |
| Trophy release:Medium release | -0.110*** | | 0.034 | |
| Log likelihood | -2384.2 | | | |
| McFadden Pseudo R2 | 0.210 | | | |
| AIC | 4836.5 | | | |
| Notes: Observations from each individual are weighted by the inverse of their predicted response propensity. Number of observations is 1,684. Number of individuals is 447. 500 Halton draws used to maximize the simulated log-likelihood. *,**, and *** represent significance at the 10%, 5%, and 1% level of significance, respectively. | | | | |

1. We set the highest income category, $200,000 or more, to $225,000. [↑](#footnote-ref-1)
